# Supplementary material for: Bracing of Pectus Carinatum in Children: Current Practices
Source: MDPI journal article supplement (doi:10.3390/children11040470), 2024-04-15
Supplement: s1 [file s1]

| Question                                                                                                                                                   | Answer categories                                                                                                    |
|------------------------------------------------------------------------------------------------------------------------------------------------------------|----------------------------------------------------------------------------------------------------------------------|
| 1. Country                                                                                                                                                 |                                                                                                                      |
| 2. Type of institution                                                                                                                                     | academic hospital • non-academic hospital                                                                            |
| 3. Type of department                                                                                                                                      | pediatric surgery • thoracic surgery • pediatrics • other (specify)                                                  |
| 4. Position                                                                                                                                                | trainee • consultant • head of department                                                                            |
| 5. Number of new patients with pectus carinatum per year                                                                                                   | ≤ 25 • 26 – 50 • 51 – 75 • 76 – 100 • ≥ 101                                                                          |
| 6. Do you consider brace-treatment for pectus carinatum patients as the first-line option?                                                                 | yes • no                                                                                                             |
| 7. What is your overall experience with pectus carinatum external bracing?                                                                                 | ≤ 3 years • 4 – 6 years • 7 – 9 years • ≥ 10 years                                                                   |
| 8. How many patients have you treated with external bracing successfully so far?                                                                           | ≤ 50 • 51 – 100 • 101 – 150 • 151 – 200 • ≥ 201                                                                      |
| 9. Who is part of the therapeutic team?<br>(more than one option can be selected)                                                                          | surgeon • orthopedist • clinical anthropologist • physiotherapist • psychologist                                     |
| 10. What do you consider as the lowest age indication for external bracing?                                                                                | ≤ 8 years • 9 - 10 years • 11 - 12 years • 13 – 14 years • ≥ 15 years                                                |
| 11. What do you consider as the contraindication for brace treatment<br>(more than one option can be selected)                                             | cardiovascular diseases • connective tissue diseases • non-compressible chest deformity • other (specify)            |
| 12. Which patients are indicated for surgical intervention?<br>(more than one option can be selected)                                                      | failure of conservative treatment • non-compressible chest deformity • rejection of brace treatment                  |
| 13. What pre-treatment diagnostic modalities do you use routinely?<br>(more than one option can be selected)                                               | cardiological workup • spirometry • X-ray • CT scan • 3D optical scanner • clinical anthropometry • photography      |
| 14. What diagnostic methods do you use to determine the improvement of chest configuration during the treatment?<br>(more than one option can be selected) | clinical examination • X-ray • CT scan • 3D optical scanner • clinical anthropometry • photography • other (specify) |
| 15. Do you assess the pressure of correction/pressure of treatment?                                                                                        | yes • no                                                                                                             |
| 16. If yes, which pressure measurement device do you use?                                                                                                  | (specify)                                                                                                            |
| 17. Recommended time for external brace wearing is                                                                                                         | ≤ 8 hours daily • 9 - 12 hours daily • 13 - 17 hours daily • ≥ 18 hours daily                                        |
| 18. Real, patient confirmed time for external brace wearing is                                                                                             | ≤ 8 hours daily • 9 - 12 hours daily • 13 - 17 hours daily • ≥ 18 hours daily                                        |
| 19. Do you recommend external brace wearing even at night?                                                                                                 | yes • no • it does not matter                                                                                        |
| 20. How often do you perform out-patient controls during external bracing?                                                                                 | more frequent than once per 3 months • approximately every 3 months • less frequent than every 3 months              |
| 21. When do you consider to change the treatment to the maintenance (retainer modus) phase?                                                                | depends on the result of: anthropologic measurements • 3D optical scans • X-ray image • the patient's satisfaction   |
| 22. When do you consider the treatment to be finished?                                                                                                     | depends on the result of: anthropologic measurements • 3D optical scans • X-ray image • the patient's satisfaction   |
| 23. How long does the brace treatment last on average?                                                                                                     | ≤ 9 months • 10 - 12 months • 13 - 15 months • 16 – 18 months • ≥ 19 months                                          |
| 24. Have you noticed a recurrence in puberty if brace treatment was indicated before the pubertal growth spurt?                                            | no • yes in 1-10% • yes, in 11-20% • yes, in 21-30% • yes, in 31-40% • yes, in more than 41                          |
| 25. Do you follow-up patients treated with external brace until the end of growth?                                                                         | yes • no                                                                                                             |
| 26. What is the most common complication during brace treatment?                                                                                           | pain • rash • oedema • itching • other (specify)                                                                     |
| 27. What is the most common reason for treatment failure?                                                                                                  | patient non-cooperation • complications • chest rigidity • other (specify)                                           |
| 28. What is the percentage of non-compliance patients?                                                                                                     | ≤ 10 % • 11 – 20 % • 21 – 30 % • 31 – 40 % • ≥ 41%                                                                   |
| 29. Do you use the treatment satisfaction questionnaire for your patients?                                                                                 | yes, during the treatment • yes, after the treatment • no                                                            |
| 30. Is the costs for external brace covered by public health insurance?                                                                                    | fully paid • partly paid • not paid at all, the patient pays for the aid himself                                     |

File S1: Pectus Carinatum Brace Treatment Survey Questionnaire
